# Supplementary material for: Network analysis of psoriasis reveals biological pathways and roles for coding and long non-coding RNAs
Source: PubMed Central journal article supplement (PMC5084355; doi:10.1186/s12864-016-3188-y), 2016-10-28

## Additional File 6

Intramodular analysis using gene significance vs module membership plots

PPvNN

Blue

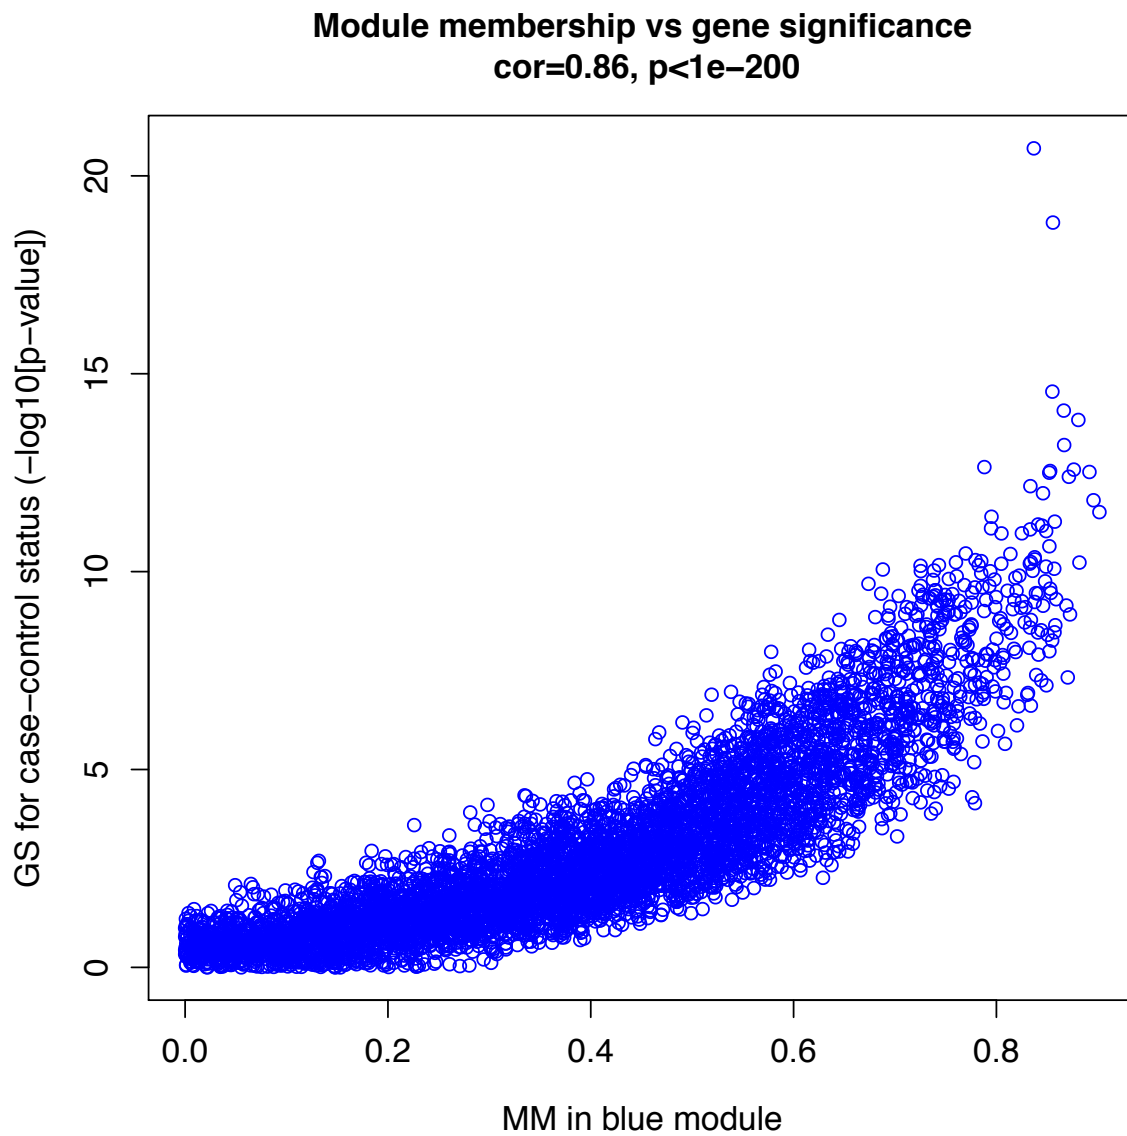

# Salmon (PPvNN)

**Module membership vs gene significance**  
**cor=0.69, p<1e-200**

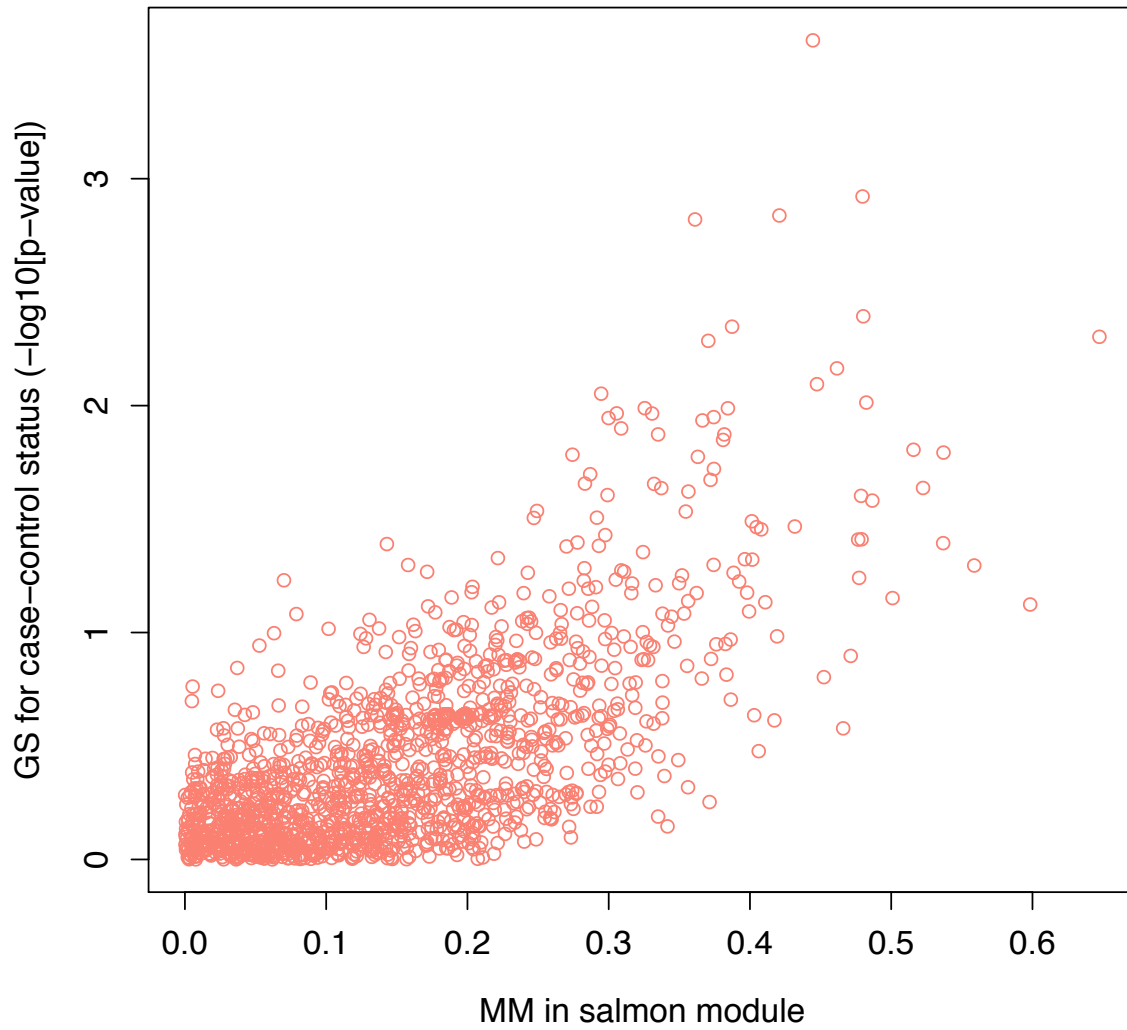

# Lavenderblush3

**Module membership vs gene significance**  
**cor=0.37, p=1.7e-05**

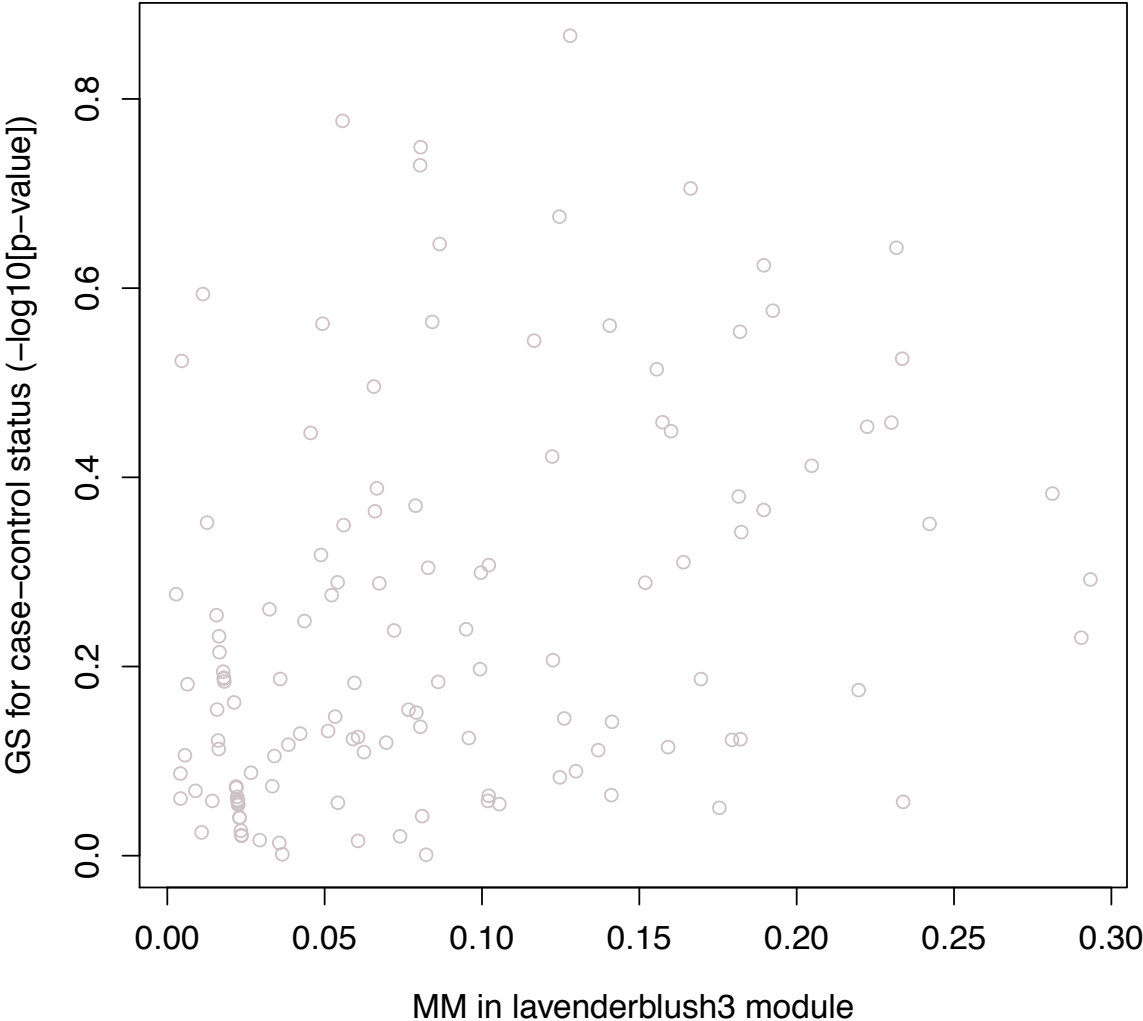

PPvPT

Sienna3

**Module membership vs gene significance**  
**cor=0.37, p=9.7e-20**

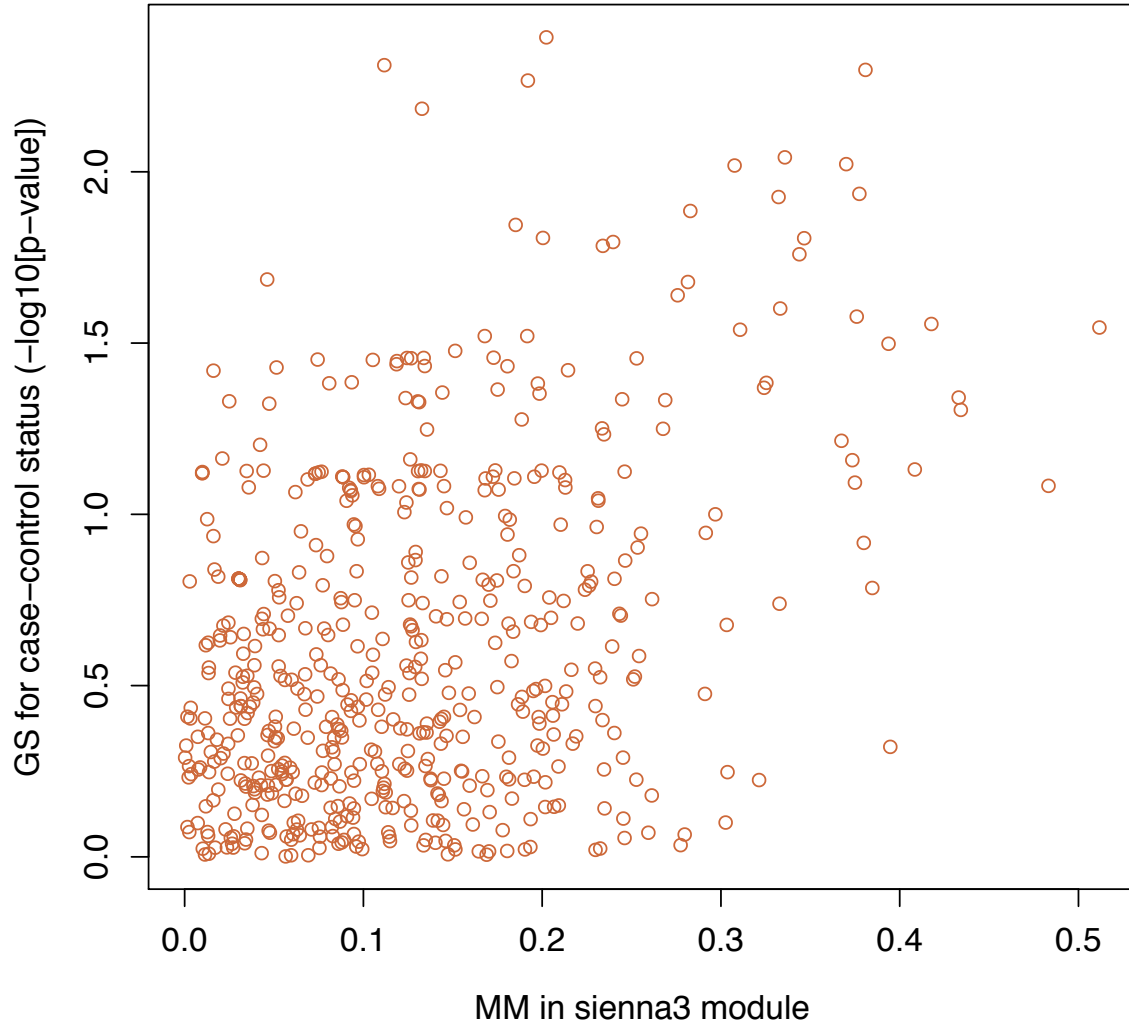

# Lightyellow

**Module membership vs gene significance**  
**cor=0.53, p=2.8e-71**

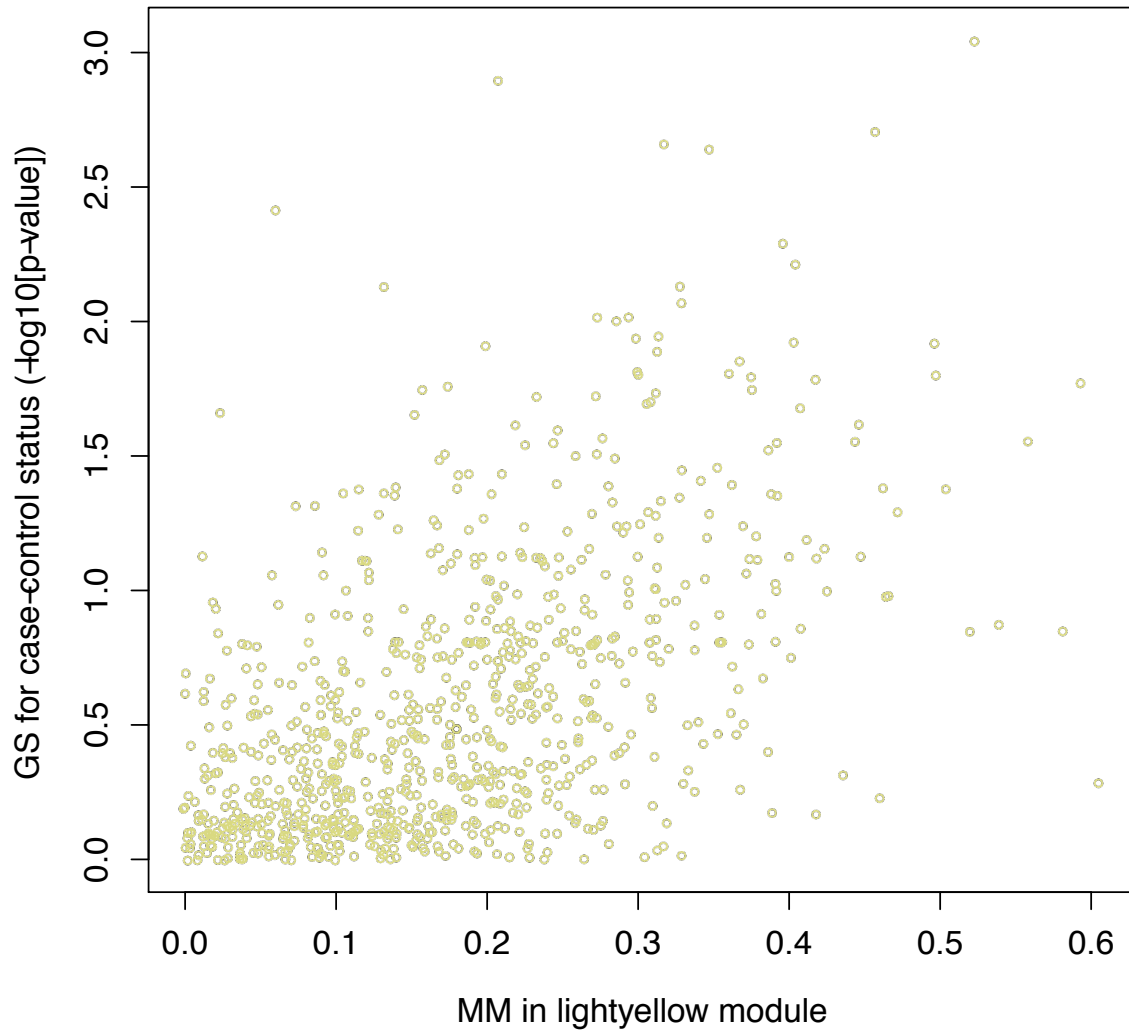

# Salmon (PPvPT)

**Module membership vs gene significance**  
**cor=0.77, p<1e-200**

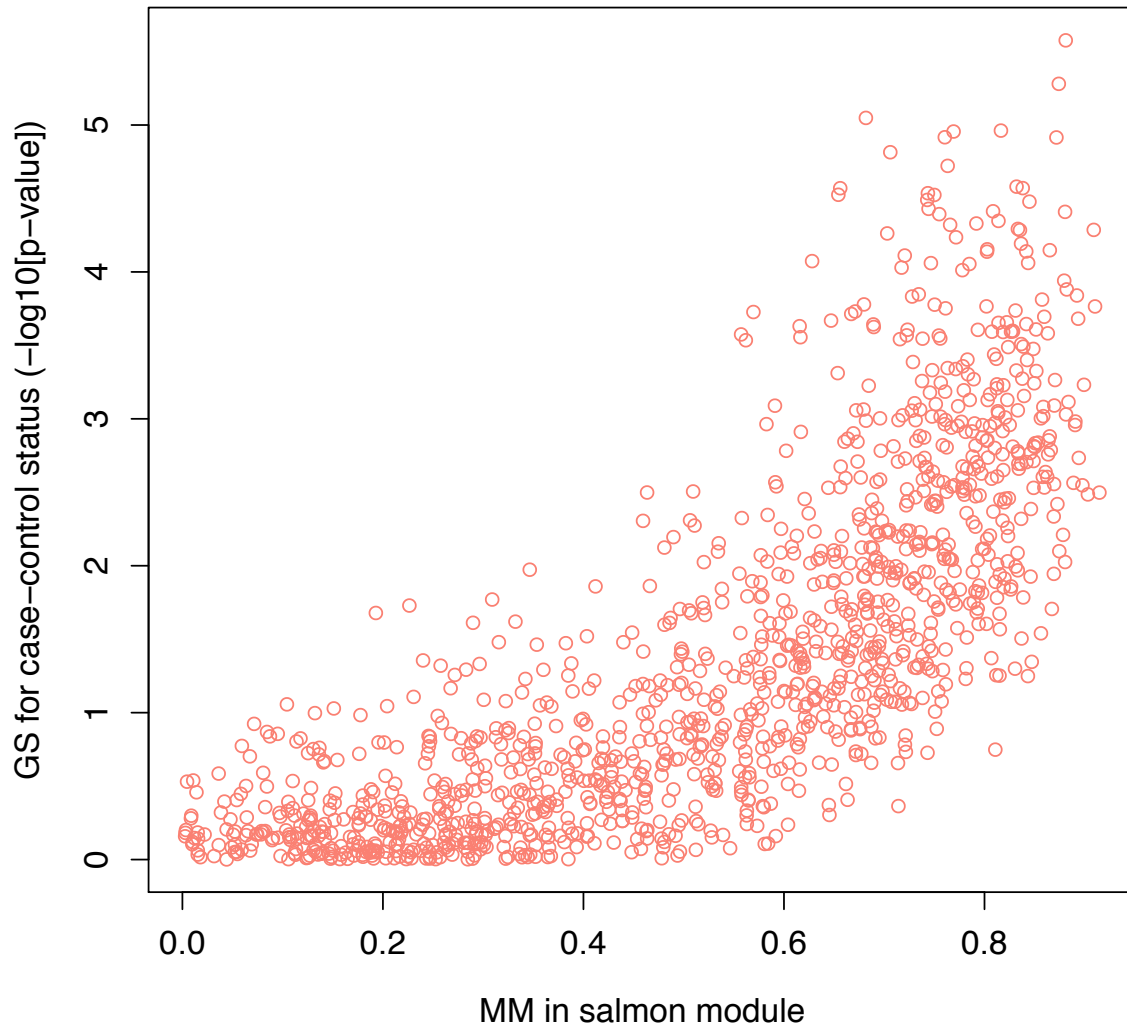

Supplement: 12864_2016_3188_MOESM6_ESM.pdf [file 12864_2016_3188_MOESM6_ESM.pdf]
